1 **LC-MS/MS-PRM Quantification of IgG glycoforms using stable isotope labeled IgG1 Fc**  
2 **glycopeptide standard**

3  
4 Miloslav Sanda<sup>a,e,g†\*</sup>, Qiang Yang<sup>b†</sup>, Guanghui Zong<sup>c†</sup>, He Chen<sup>b</sup>, Zhihao Zheng<sup>b</sup>, Harmeet  
5 Dhani<sup>d</sup>, Khalid Khan<sup>d</sup>, Alexander Kroemer<sup>d</sup>, Lai-Xi Wang<sup>c\*</sup>, Radoslav Goldman<sup>a,e,f</sup>

6  
7 <sup>a</sup>Department of Oncology, Lombardi Comprehensive Cancer Center, Georgetown University,  
8 Washington, D.C. 20057; <sup>b</sup>GlycoT Therapeutics, College Park, MD 20742, <sup>c</sup>Department of  
9 Chemistry and Biochemistry, University of Maryland, College Park, MD 20742; <sup>d</sup>MedStar  
10 Georgetown Transplant Institute, MedStar Georgetown University Hospital and the Center for  
11 Translational Transplant Medicine, Georgetown University Medical Center, Washington, D.C.,  
12 20057; <sup>e</sup>Clinical and Translational Glycoscience Research Center, Georgetown University,  
13 Washington, D.C., 20057; <sup>f</sup>Department of Biochemistry and Molecular & Cell Biology,  
14 Georgetown University, Washington, D.C., 20057, <sup>g</sup>Max-Planck-Institut fuer Herz- und  
15 Lungenforschung, Ludwigstrasse 43, Bad Nauheim, 61231, Germany ; †Authors contributed  
16 equally to this work.

17  
18 \*Corresponding author email: ms2465@georgetown.edu; tel: +1 202-6876279;  
19 wang518@umd.edu; tel: +1 301-4057527

20

21

22 **Keywords:** Glycoproteomics • PRM Analysis • Glycopeptide Synthesis • Mass Spectrometry •  
23 Immunoglobulins

24 **ABSTRACT**

25 Targeted quantification of proteins is a standard methodology with broad utility, but targeted  
26 quantification of glycoproteins has not reached its full potential. The lack of optimized  
27 workflows and isotopically labeled standards limits the acceptance of glycoproteomics  
28 quantification. In this paper, we introduce an efficient and streamlined chemoenzymatic  
29 synthesis of a library of isotopically labeled glycopeptides of IgG1 which we use for  
30 quantification in an energy optimized LC-MS/MS-PRM workflow. Incorporation of the stable  
31 isotope labeled N-acetylglucosamine enables an efficient monitoring of all major fragment ions  
32 of the glycopeptides generated under the soft collision induced dissociation (CID) conditions  
33 which reduces the CVs of the quantification to 0.7-2.8%. Our results document, for the first time,  
34 that the workflow using a combination of stable isotope labeled standards with intra-scan  
35 normalization enables quantification of the glycopeptides by an electron transfer dissociation  
36 (ETD) workflow as well as the CID workflow with the highest sensitivity compared to  
37 traditional workflows., This was exemplified by a rapid quantification (13-minute) of IgG1 Fc  
38 glycoforms from COVID-19 patients.

39

40 **INTRODUCTION**

41 N-glycosylation is a common and complex post-translational modification of proteins<sup>1-3</sup> whose  
42 impact on an organism increases with its complexity<sup>4</sup>. Defects in this pathway in humans lead to  
43 congenital disorders of glycosylation (CDG) often incompatible with life<sup>5</sup>. The N-glycosylation  
44 process is initiated in the endoplasmic reticulum by an oligosaccharyl transferase (OST) complex  
45 <sup>6</sup> which transfers a common lipid-linked N-glycan building block to an asparagine in an NXS/T  
46 sequon (X≠P)<sup>7</sup>. The attached N-glycans are trimmed and further expanded by multiple

47 glycosidases and glycosyltransferases during the maturation of the secreted/membrane proteins  
48 in the Golgi apparatus. Appropriate glycosylation is critical in many important molecular  
49 recognition processes, including protein folding, protein trafficking, and protein-protein/glycan  
50 interactions<sup>8-10</sup>. Perhaps the most studied glycoprotein is the immunoglobulin G (IgG)<sup>11, 12</sup>.  
51 Glycosylation of the N297 of human IgG is known to modulate interactions with the Fc receptors  
52 <sup>13</sup> and subsequent biological<sup>14</sup> and therapeutic<sup>15</sup> responses. It is therefore of considerable interest  
53 to quantify accurately the IgG glycoforms. So far, many analytical methods have been  
54 introduced for this purpose<sup>16-23</sup>, including mass spectrometric methods for relative quantification  
55 of the IgG glycopeptides<sup>22, 23</sup>. In spite of these advances, the quantification of IgG glycoforms  
56 and other glycopeptides by targeted mass spectrometric methods has been limited,<sup>21</sup> in contrast  
57 to the quantification of metabolites, drugs or proteins, for which well-established analytical  
58 approaches with clinical utility have been established<sup>25-27</sup>. One reason for the limited acceptance  
59 of IgG glycoform quantification in clinical samples is the dominant production of less specific  
60 glycan fragments (oxonium ions) under CID conditions used typically for the fragmentation of  
61 glycopeptides<sup>28-30</sup>. Another reason is the lack of synthetic isotope labeled standards (SIS) of  
62 glycopeptides which present a substantial synthetic challenge despite recent advances in the  
63 chemical and chemoenzymatic synthetic approaches<sup>31-34</sup>. In the course of our study, Li and  
64 coworkers have reported a chemoenzymatic synthesis of an array of fucose isotope-labeled Fc  
65 glycopeptides for their absolute quantitation but the method is limited to core-fucosylated  
66 glycopeptides<sup>35</sup>. In this study, we report a more efficient modular and streamlined synthetic  
67 route for both core-fucosylated and non-fucosylated glycopeptides<sup>35</sup>. Accordingly, we advance  
68 the quantification of the IgG glycoforms by introduction of the SIS glycopeptides in combination  
69 with our energy optimized targeted mass spectrometric quantification workflow.

70

71

## 72 **MATERIALS and METHODS**

73

### 74 **Synthesis of stable isotope-labeled IgG1 Fc glycopeptides**

75 D-[UL-<sup>13</sup>C<sub>6</sub>]-N-Acetylglucosamine was purchased from Cambridge Isotope Lab, Inc. Fmoc-  
76 amino acids were purchased from ChemPep, Inc. All other chemicals, reagents, and solvents  
77 were purchased from Sigma–Aldrich.

78

### 79 **SPPS of <sup>13</sup>C-labeled IgG1-Fc-GlcNAc peptide (IgG1-FcP-Gn, compound 5)**

80

81 Preparation of <sup>13</sup>C-labeled IgG1-FcP-Gn acceptor was performed under microwave synthesis  
82 conditions using a CEM Liberty Blue microwave peptide synthesizer. Synthesis was based on  
83 Fmoc chemistry using Rink Amide resin (0.66 mmol/g) on a 0.1 mmol scale, following the  
84 protocol as described by Zong et al.<sup>37</sup>, with incorporation of <sup>13</sup>C-labeled GlcNAc-Asn. The crude  
85 peptides were purified by RP-HPLC and the purity and identity were confirmed by analytical  
86 HPLC and LC–MS analysis. An unlabeled identical peptide was synthesized using the same  
87 protocol as well.

88

### 89 **Synthesis of <sup>13</sup>C-labeled IgG1-Fc-GlcNAcFuc peptide (IgG1-FcP-GnF, compound 5)**

90

91 <sup>13</sup>C-labeled IgG1-FcP-GnF was synthesized by transfer of fucosyl moiety to <sup>13</sup>C labeled IgG1-  
92 FcP-Gn with a fucoligase AlfC-E274A, using α-L-Fucosyl fluoride as the donor, following  
93 published procedures<sup>36, 45</sup>.

94

95 **Preparation of various glycan oxazolines.**

96

97 Various biantennary complex glycans were prepared from a combination of mild acid treatment  
98 and enzyme trimmings from sialylglycopeptide (SGP) that was isolated from egg yolk powder<sup>43</sup>.  
99 First, the SGP was partially desialyted with trifluoro acid (TFA). In a typical protocol, 220 mg  
100 SGP was treated with 0.4% of trifluoro acid TFA (pH ~2) at 50 °C for 2-4 h to reach  
101 approximately 50% desialylation. The partially desialylated SGP mixture was neutralized with 1  
102 M NaOH and then cleaved with an endoglycosidase Endo-S2<sup>42</sup> to dissociate the glycan and  
103 peptide portions. After desalting with a Sephadex G-10 column, the S1G2, S2G2, and G2 glycan  
104 were separated with anion exchange chromatography on a HiTap Q-XL column with a 0 to 0.2  
105 M NaCl gradient. G2 glycan that was mixed with peptide portion was further purified with cation  
106 exchange with a HiTrap Q-XL column in a pass-through mode. G0 glycan was obtained by the  
107 treatment of G2 glycan with a  $\beta$ 1,4-galactosidase, BgaA<sup>47</sup>. To prepare G1 glycan, S1G2 glycan  
108 was trimmed with BgaA to generate S1G1 glycan, which was further processed with a  
109 neuraminidase, MvNA<sup>40</sup> to afford targeted G1 glycan. All the glycans were converted to  
110 activated oxazolines for glycosidase-mutant catalyzed transglycosylation, following the  
111 previously reported procedure<sup>48</sup>.

112

113 **Synthesis of <sup>13</sup>C-labeled IgG1-Fc glycopeptides.**

114

115 Fucosylated glycopeptides were synthesized by the EndoF3 glycosynthase mutant EndoF3-  
116 D165A catalyzed transglycosylation, following our previously published procedure<sup>38</sup>. The

117 product was purified by prep HPLC with a semiPrep HPLC column. None-fucosylated  
118 glycopeptides were synthesized by glycan transfer with the EndoCC mutant, EndoCC-N180H<sup>37</sup>.  
119 In a typical EndoCC-N180H catalyzed reaction, 1 mg of <sup>13</sup>C-labeled IgG1-Fc-GlcNAcFuc  
120 peptide was mixed with 3 mol. eq. of glycan oxazolines, 0.1 µg/µL the glycosynthase (EndoCC-  
121 N180H) in a phosphate buffer (100 µL, 50 mM, pH 7). The reaction mixture was incubated at 30  
122 °C for 30-60 min, with LC-MS monitoring of reaction progression. 90-95% of glycan transfer  
123 were achieved under such condition. The final product was purified by prep HPLC. After  
124 lyophilization, the synthesized glycopeptides were weighed on an accurate balance and further  
125 quantitated by analytic HPLC with IgG1-FcP-GlcNAc as the internal standard.

126

#### 127 **Patient enrollment and blood sample processing**

128

129 Participants who were diagnosed with COVID-19 between March and July, 2020, using reverse  
130 transcriptase polymerase chain reaction for SARS-CoV-2, were enrolled in collaboration with  
131 the MedStar Georgetown Transplant Institute, MedStar Georgetown University Hospital and the  
132 Center for Translational Transplant Medicine, Georgetown University Medical Center,  
133 Washington, D.C. (**Supplemental table 2**), under protocols approved by the Georgetown  
134 University Medical Center IRB (Approval # STUDY00002359; IRB # 2017-0365). Samples  
135 obtained from participants before the COVID-19 era were used as controls. All participants  
136 provided written informed consent. Blood was collected in serum vacutainer (BD Vacutainer  
137 CPT; BD Biosciences) and processed within 12 hours of blood draw by centrifuging at 1200xg  
138 for 10 minutes. Aliquots of 0.5mL were placed into vials and stored at -80°C until further use.  
139 Aliquots of thawed serum were diluted 1:69 with a sodium bicarbonate solution and processed as

140 described previously<sup>20</sup> with minor modifications. Briefly, diluted serum was reduced with 5 mM  
141 DTT for 60 min at 60°C and alkylated with 15 mM iodoacetamide for 30 min in the dark.  
142 Trypsin Gold (Promega, Madison, WI) digestion (2.5 ng/μl) at 37°C in Barocycler NEP2320  
143 (Pressure BioSciences, South Easton, MA) for 1 hour, samples were evaporated using a vacuum  
144 concentrator (Labconco), and dissolved in mobile phase A (2% ACN, 0.1% FA). Tryptic  
145 peptides were analyzed without further processing to ensure reliable quantification of the  
146 glycoforms.

147

#### 148 **Glycopeptide analysis by a nano LC-MS/MS-PRM workflow**

149

150 Glycopeptide separation was achieved on an Ultimate 3000 nano chromatography system using a  
151 capillary analytical 75 μm x 150 PEPmap300, 3 μm, 300 Å column (Thermo) interfaced with an  
152 Orbitrap Fusion Lumos (Thermo). Glycopeptides were separated at 0.3 μl/min as follows:  
153 starting conditions 5% ACN, 0.1% formic acid; 1-35 min, 5–50% ACN, 0.1% formic acid; 35-37  
154 min, 50–95% ACN, 0.1% formic acid; 37-40 min 95% ACN, 0.1% formic acid followed by  
155 equilibration to starting conditions for additional 20 min. For all runs, we have injected 0.5 μl  
156 (0.5 μg of human serum proteins derived from 7.1 nl of serum) of tryptic digest directly on  
157 chromatography column. We have used a Parallel Reaction Monitoring (PRM) workflow with  
158 one MS1 full scan (400-1800 m/z) and scheduled MS/MS fragmentation of IgG1 glycopeptides  
159 either completely cleaved or with one missed cleavage. We created a PRM list for non-labelled  
160 IgG glycopeptides as well as for the labeled glycopeptides. Fragmentation spectra were recorded  
161 in the range 300-2,000 m/z, with an isolation window 1.6 Da for interscan calibration and 10 Da  
162 for intrascan calibration. Normalized collision energy was set to 11 for low CE fragmentation

163 and 35 for high CE fragmentation. MS/MS spectra were recorded with a resolution of 30,000 and  
164 MS spectra with a resolution of 120,000. We used the same parameters for the methodology of  
165 EThcD fragmentation where we used calibrated reaction times and supplemental NCE was set to  
166 11. Measurement of 5 replicates was used for fragmentation characteristic determination.

167

### 168 **Optimization of the LC-MS/MS micro-flow measurement**

169

170 Glycopeptide separation was achieved on an Ultimate 3000 nanochromatograph in microflow  
171 mode using a PEPmap300 capillary column 75  $\mu\text{m}$  x 2cm, 5  $\mu\text{m}$ , 300  $\text{\AA}$  (Thermo) interfaced with  
172 an Orbitrap Fusion Lumos (Thermo). Glycopeptides were separated as follows: starting  
173 conditions 2% ACN, 0.1% formic acid; 0-1 min 2% ACN, flow 5 $\mu\text{l}$  1-2 min, 2–5% ACN, 0.1%  
174 formic acid, flow 1.5 $\mu\text{l}$ ; 2-5 min, 5–98% ACN, 0.1% formic acid, flow 1.5 $\mu\text{l}$ ; 7-9 min 98%  
175 ACN, 0.1% formic acid, flow 1.5 $\mu\text{l}$  followed by equilibration to starting conditions for an  
176 additional 4 min. Microflow multinozzle emitter (NEWOMICS) was used as the microflow  
177 sprayer. We have used a Parallel Reaction Monitoring (PRM) workflow with one MS1 full scan  
178 (400-1800 m/z) and scheduled MS/MS fragmentation of completely cleaved IgG1 glycopeptides  
179 as described previously<sup>23</sup>.

180

### 181 **LC-MS/MS microflow measurement of the samples of Covid 19 infected patients**

182

183 Serum samples were measured using the optimized microflow method described above. We  
184 injected 0.2  $\mu\text{g}$  of the serum protein digest directly on the column. All measurements were done  
185 in triplicate.



186

## 187 **Data analysis**

188 Xcalibur and Quan Browser (Thermo) software was used for quantitative data processing.

189 Processing methods were created for ion extraction from each PRM transition in line with our  
190 previous observations<sup>23</sup>. Briefly, PRM transitions of soft fragments (arm loss) were extracted

191 with 20ppm accuracy. Data were processed with no smoothing and chromatogram was

192 visualized using 10 minutes retention time window of expected retention time. Area of integrated

193 peak was used for further data processing. Further data processing and graphing was carried out

194 in Microsoft Excel.

195

## 196 **RESULTS AND DISCUSSION**

### 197 **Synthesis of the isotope-labeled IgG glycopeptide standards**

198 In this study, we report a highly convergent and streamlined chemoenzymatic approach for the

199 synthesis <sup>13</sup>C-labeled fucosylated and non-fucosylated glycopeptides standards for quantitation

200 of IgG glycoforms. The key procedure of this modular approach was the efficient synthesis of

201 <sup>13</sup>C-labeled IgG1-Fc peptide-GlcNAcFuc glycopeptide by a fucoligase AlfCE274A<sup>36,37</sup>, which

202 serves as the key acceptor to afford all fucosylated glycopeptides. It overcomes the substrate

203 specificity limitation of the  $\alpha$ 1,6-fucosyltransferase (FUT8), which strictly requires the presence

204 of GlcNAc at  $\alpha$ 1,3 arm of N-glycan substrate for fucose transfer<sup>38,39</sup>. Afterwards, respective N-

205 glycan could be transferred to the precursors from a corresponding N-glycan oxazoline by a

206 glycosynthase-catalyzed reaction to afford the <sup>13</sup>C-labeled Fc glycopeptide. Non-fucosylated

207 glycopeptides were transferred with EndoCC-D180H mutant<sup>40</sup> while core fucosylated

208 glycopeptide was synthesized with EndoF3-D165A mutant<sup>41</sup>.

209 The synthetic route of  $^{13}\text{C}$ -labeled IgG1-Fc-GlcNAc(Fuc) glycopeptides is depicted in **Scheme 1**.  
210 Among possible sites for isotope labeling, we chose  $^{13}\text{C}$ -labeled GlcNAc (**1**, Cambridge Isotope  
211 Laboratories, Inc) as the starting material to incorporate  $^{13}\text{C}$ -labeling in the core GlcNAc-Asn  
212 structure which is shared by all Fc N-glycans. The incorporation of the building block in  
213 glycopeptides gives a 6 Dalton difference between the “heavy” and “light” isotopic  
214 glycopeptides. The synthesis of  $^{13}\text{C}$ -labeled glycopeptide started with the conversion of  $^{13}\text{C}$ -  
215 labeled GlcNAc (**1**) to the  $\beta$ -glycosyl azide (**2**) via the  $\alpha$ -glycosyl chloride and SN2 azide  
216 substitution under phase transfer catalysis. Although the large  $^{13}\text{C}$ - $^1\text{H}$  and  $^{13}\text{C}$ - $^{13}\text{C}$  coupling  
217 caused the splitting of proton and carbon signals makes the characterization of the product more  
218 complicated, a fully assignment of the proton and carbon signals is achieved by COSY and  
219 HSQC NMR (see supporting information). Reducing the azido group in **2** by palladium-  
220 catalyzed hydrogenation to generate  $\beta$ -glycosyl amine, followed by amide formation with Fmoc-  
221 Asn-OtBu using HATU/DIPEA as coupling reagent to give the protected building block **3**, which  
222 was then deprotected using formic acid to give the  $^{13}\text{C}$  labeled building block **4**. This building  
223 block was incorporated in the solid-phase peptide synthesis (SPPS) using the Fmoc chemistry on  
224 a Rink Amide AM resin (**Scheme 1A**) following our previously reported protocol<sup>37</sup> to provide  
225 the  $^{13}\text{C}$ -Fc-peptide-GlcNAc precursor (**5**). The  $^{13}\text{C}$ -labeled peptide-GlcNAcFuc precursor (**7**),  
226 was readily synthesized by using the fucoligase AlfC-E274A<sup>36</sup>, with fucosyl fluoride (**6**) as the  
227 donor (**Scheme 1A**).

228

229 **Preparation of different glycans from an egg yolk sialylglycopeptide**

230

231 We prepared different biantennary complex type N-glycan from a sialylglycopeptide (SGP, **8**)  
232 purified from egg yolk powder as shown in **Scheme 1B**. After partial desialylation with 0.5% of  
233 trifluoroacetic acid (TFA), SGP was cleaved with Endo-S2 endoglycosidase<sup>39</sup>, and then  
234 separated by anion exchange according to the sialylation status, resulting in S2G2 (**9**), S1G2  
235 (**10**), and G2 (**11**) glycans. S1G2 glycan was processed with a  $\beta$ 1,4-galactosidase to get S1G1  
236 glycan (**13**), followed by full desialylation with 0.5% TFA to generate the G1 glycoform (**14**). In  
237 parallel, mixture of the G2 glycan and peptide-GlcNAc (**12**) was separated by cation exchange,  
238 in which the pep-Gn with two positively charged lysine was captured by SP column. Purified G2  
239 was trimmed to afford a G0 glycan (**15**) with a  $\beta$ 1,4-galactosidase. With this process, we could  
240 easily prepare 30 to 50 mg S2G2, S1G2, G2, G1, and G0 (most abundant form of IgG) from 500  
241 mg of the SGP. The glycans were converted to oxazolines (**16-20**) for the subsequent  
242 chemoenzymatic transfer to the peptides (**Scheme 1B**).

243

244

245

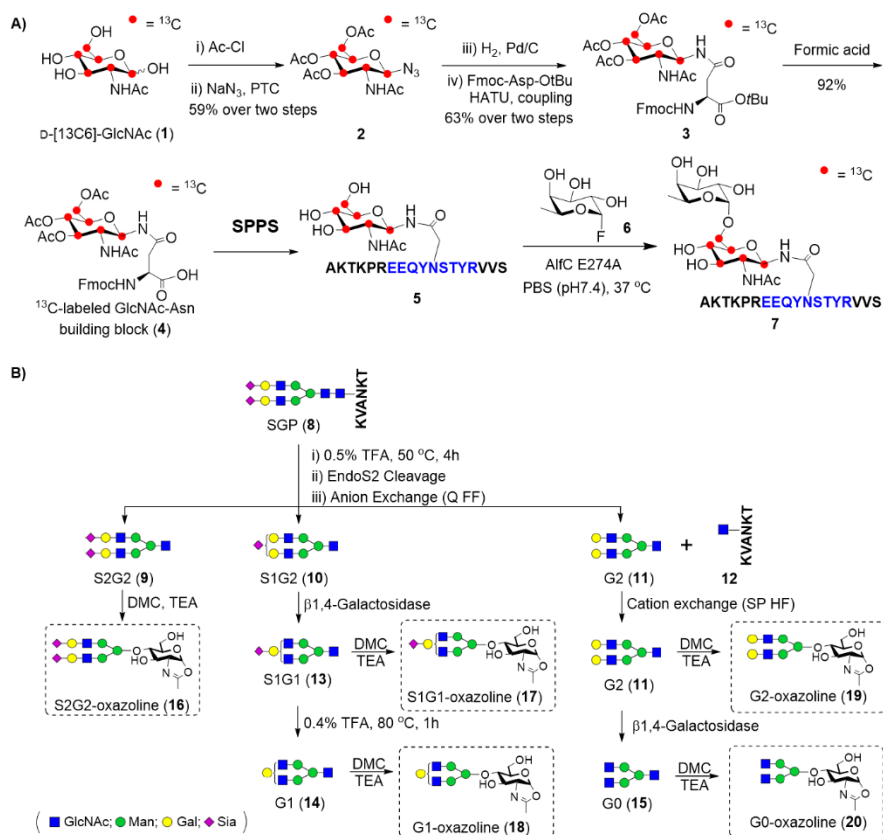

246

247 **Scheme 1.** Synthesis of the  $^{13}\text{C}$ -labeled N-acetylglucosamine (GlcNAc)-peptide precursors (A)  
 248 and different N-glycan oxazolines (B).

249

## 250 Synthesis of $^{13}\text{C}$ -labeled IgG1 Fc glycopeptide library

251

252 A  $^{13}\text{C}$ -labeled IgG1 Fc glycopeptide library was prepared by glycosynthase-catalyzed transfer of  
 253 a corresponding N-glycan oxazoline to the peptide precursors (**Scheme 2**). Non-fucosylated  
 254 glycopeptides (**21, 23-26**) were transferred with EndoCC-D180H mutant which is more stable  
 255 than the EndoM-N175Q mutant (another glycosynthase that transglycosylates complex glycans  
 256 to the non-fucosylated acceptors) and generally give >95% transfer efficiency. Core fucosylated  
 257 glycopeptides (**22, 27-30**) were synthesized with EndoF3-D165A mutant which also achieves  
 258 >95% glycan transfer in all cases tested. The glycopeptide product was purified with semi-

259 preparative HPLC and characterized with LC-ESI-MS. **Table 1** shows a summary of the IgG1 Fc  
 260 peptides (Fc1P) synthesized. The HPLC and ESI-MS profile of each glycopeptide is shown in  
 261 **Supplementary Figure 4 and 5**. The  $^{13}\text{C}$ -labeled peptide was quantitated by UV absorbance at  
 262 280 nm, using a non-isotope labeled Fc1P-Gn peptide as the internal standard (**Supplementary**  
 263 **Figure 6**).

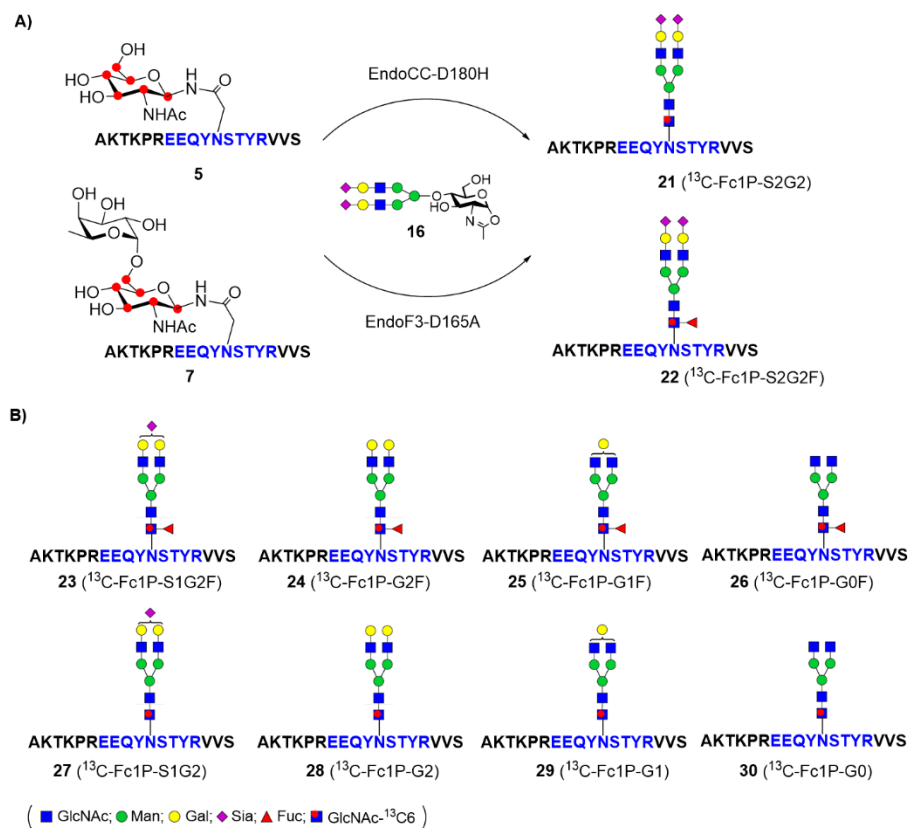

264

265 Scheme 2. Chemoenzymatic synthesis of various isotope labelled IgG1-Fc glycopeptides.

266

| Peptide                         | M.W.    | Quantity (mg) | Yield | Purity (HPLC) |
|---------------------------------|---------|---------------|-------|---------------|
| $^{13}\text{C}$ -Fc1P-S2G2 (21) | 4366.28 | 1.49          | >90%  | >90%          |
| $^{13}\text{C}$ -Fc1P-S1G2 (27) | 4075.19 | 1.64          | >90%  | >90%          |
| $^{13}\text{C}$ -Fc1P-G2 (28)   | 3784.09 | 0.73          | >90%  | >95%          |
| $^{13}\text{C}$ -Fc1P-G1 (29)   | 3622.06 | 1.31          | >90%  | >95%          |
| $^{13}\text{C}$ -Fc1P-G0 (30)   | 3459.99 | 1.14          | >90%  | >95%          |

|                                 |         |      |      |      |
|---------------------------------|---------|------|------|------|
| <sup>13</sup> C-Fc1P-G0F (26)   | 3606.04 | 1.55 | >90% | >95% |
| <sup>13</sup> C-Fc1P-S2G2F (22) | 4512.33 | 1.08 | >90% | >95% |
| <sup>13</sup> C-Fc1P-S1G2F (23) | 4221.24 | 1.75 | >90% | >95% |
| <sup>13</sup> C-Fc1P-G2F (24)   | 3930.17 | 1.72 | >90% | >95% |
| <sup>13</sup> C-Fc1P-G1F (25)   | 3768.09 | 1.49 | >90% | >95% |

267  
268

269

270

271 **Table 1. Synthesized <sup>13</sup>C-labeled IgG1 glycopeptides.**

272

273 **Fragmentation of IgG standards using low and high collision energy (HCD) fragmentation**

274

275 We optimized the fragmentation of a core fucosylated synthetic glycopeptide under several  
276 acquisition conditions. Under low collision energy CID on a Sciex Q-TOF 5600<sup>20</sup> and HCD on  
277 an Orbitrap Fusion Lumos, we observed two major fragments related to the loss of a singly  
278 charged N-glycan arm, with and without mannose, as described previously<sup>20, 35</sup>. Fragmentation of  
279 the IgG glycopeptides using CID and HCD resulted in a similar fragmentation profile (data not  
280 shown). For final testing of selectivity and reproducibility we used HCD with low (11) and high  
281 (35) NCE as well as narrow (1.6 Da) and wide (10 Da) window. Fragmentation was tested on  
282 purified IgG glycopeptide standards, while selectivity of the signals for IgG MS/MS product ions  
283 was studied using serum spiked with a mixture of the IgG glycopeptide standards.

284

285 **Quantification of the IgG glycopeptides under low vs high NCE conditions**

286

287 We have compared HCD fragmentation of IgG glycopeptides for PRM quantification in  
288 unfractionated human serum using high and a low CE conditions as described previously 20.  
289 Briefly, glycopeptides were fragmented to high-intensity B ions (oxonium ions) and medium-  
290 intensity Y ions containing peptide-HexNAc and peptide HexNAc-Fuc fragments. Selectivity of  
291 the major oxonium ion 366.1 (HexNAc-Hex) and major Y ion (Peptide-HexNAc) for PRM  
292 glycopeptide quantification in unfractionated human serum is shown in **Figure 1**. Specificity of  
293 the HexNAc-Hex disaccharide produced by the fragmentation of all galactosylated peptides is  
294 not sufficient for a selective quantification of the IgG1 glycopetides except the G1 glycopeptide.  
295 The more specific Y1 fragment (peptide-HexNAc) provides sufficient signal to noise (S/N) ratio  
296 for quantification of the IgG1 glycopeptides. In case of the asymmetric structure, such as G1, the  
297 S/N of the Y1 fragment is on the border of the LOQ. A combination of low CE fragmentation  
298 with soft fragment monitoring provides the highest intensities and S/N which enables the PRM  
299 mass spectrometric analysis of low-abundant IgG1 glycoforms that we could not reach in the  
300 unfractionated human serum using the high CE methods (**Figure 1**).

301

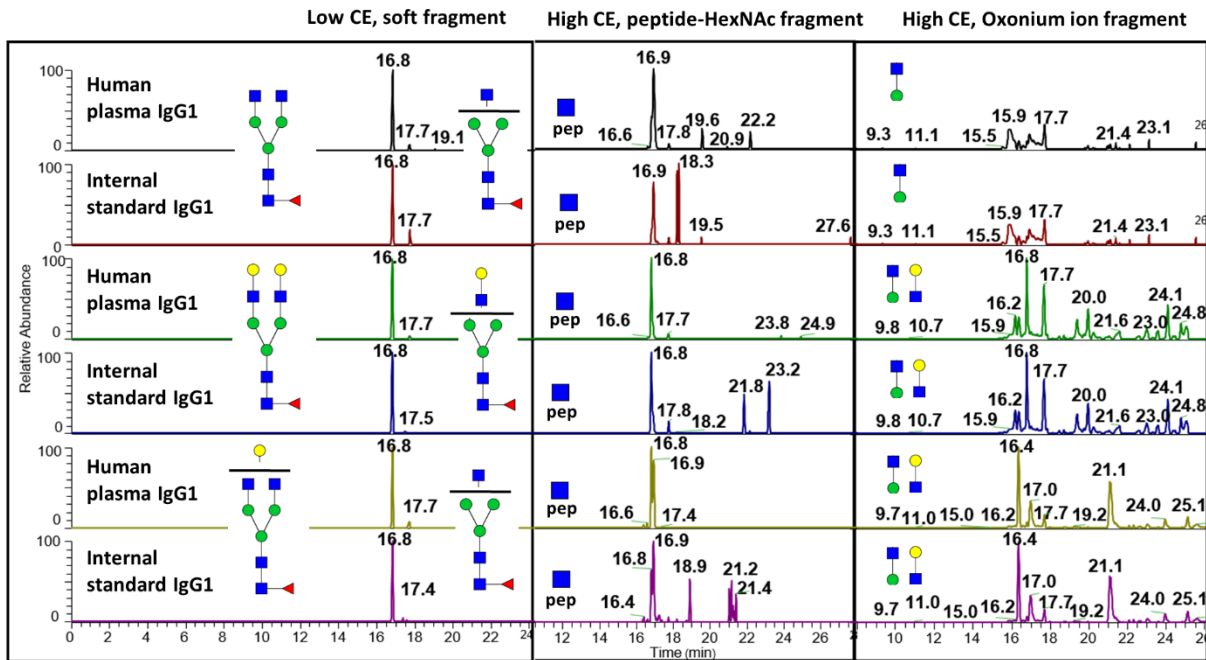

302

303 **Figure 1.** Selectivity of glycopeptide fragments recorded under different CE conditions. Low CE  
304 condition (NCE 11), signal of antenna loss Y fragment ion (Left), High collision energy (NCE  
305 35), signal GlcNAc peptide Y fragment ion, High collision energy (NCE 35) signal of  
306 HexNAcHex oxonium ion

307

308

309 **Inter- and intra-scan normalization using stable isotope labeled standards to reduce**  
310 **variability of the measurement**

311 The primary purpose of internal calibration is to reduce variability due to the fluctuation of the  
312 mass spectrometric signal. We have compared performance of our methodology with and  
313 without internal calibration. Using internal calibration, we were able to reduce signal variability  
314 below 15% over maximal and for the low CE and below 20% for the high CE methods as  
315 determined for five replicates of each measurement in the unfractionated human serum (**Table**



316 2), in line with the FDA guidelines for LOQ determination in biological mass spectrometry  
317 measurements. To improve accuracy of the measurement, we have introduced and tested  
318 methods for intra-scan normalization of the PRM workflow. The use of a wide (10Da) window  
319 for normalization allowed us to monitor the analyte signal and internal standard in the same  
320 fragmentation spectrum. This significantly reduced signal fluctuation due to the fragmentation  
321 processes (isolation and fragmentation) as opposed to inter-scan normalization where only pre-  
322 fragmentation processes (matrix effect etc.) were normalized. An example of MS/MS product  
323 spectra of glycopeptides using a wide fragmentation window was presented in **Figure 2**. We  
324 tested narrow and wide fragmentation windows for the high and low CE fragmentation methods.  
325 Panel A showed low CE fragmentation spectra of the G0F glycoform of the IgG1 peptide with  
326 the loss of one HexNAc as a major soft fragment. Panel B showed a CE spectrum of the G0F  
327 glycoform of the IgG1 peptide with the Y1 fragment obtained using a wide isolation window.  
328 We used the ratio of the monoisotopic ions of the IgG glycopeptide and the labeled standard for  
329 signal normalization. **Table 2** documented a significant reduction of the RSD of the intra-scan  
330 normalization; we observe RSDs in the interval 0.6-2.8% under the low CE fragmentation  
331 conditions. **Figure 3** showed sensitivity and variability comparison of all optimized workflows  
332 for 3 tested glycoforms. The best workflow was found to be the intra-scan normalization using  
333 low (11) normalized collision energy which is the workflow with the highest sensitivity for all  
334 glycoforms and with the lowest variability in 2 out of 3 glycoforms. Comparison of selectivity  
335 was shown in **Figure 4**. Isolation window 10Da recorded under low collision energy had similar  
336 performance in analysis of unfractionated human serum as isolation window 1.6Da, which did  
337 not introduce any significant interferences that could have negative influence to quantitative  
338 performance of optimized methodology.

339

340

| Structure  | Low NCE_10 | Low NCE_1.6 | High NCE_10 | High NCE_1.6 | ETHCD 10 | ETHCD 1.6 |
|------------|------------|-------------|-------------|--------------|----------|-----------|
| <b>G0F</b> | 2.84       | 5.97        | 5.11        | 36.76        | 12.05    | 43.39     |
| <b>G2F</b> | 0.64       | 11.79       | 2.44        | 8.31         | 2.18     | 22.74     |
| <b>G1F</b> | 1.24       | 1.97        | 3.11        | 15.30        | 3.20     | 17.68     |

341

342 **Table 2.** Comparison of the RSD of measurements based on inter-scan (1.6 Da) and intra-scan  
 343 (10 Da) normalization using unfractionated human serum with spiked labeled IgG internal  
 344 standards.

345

346

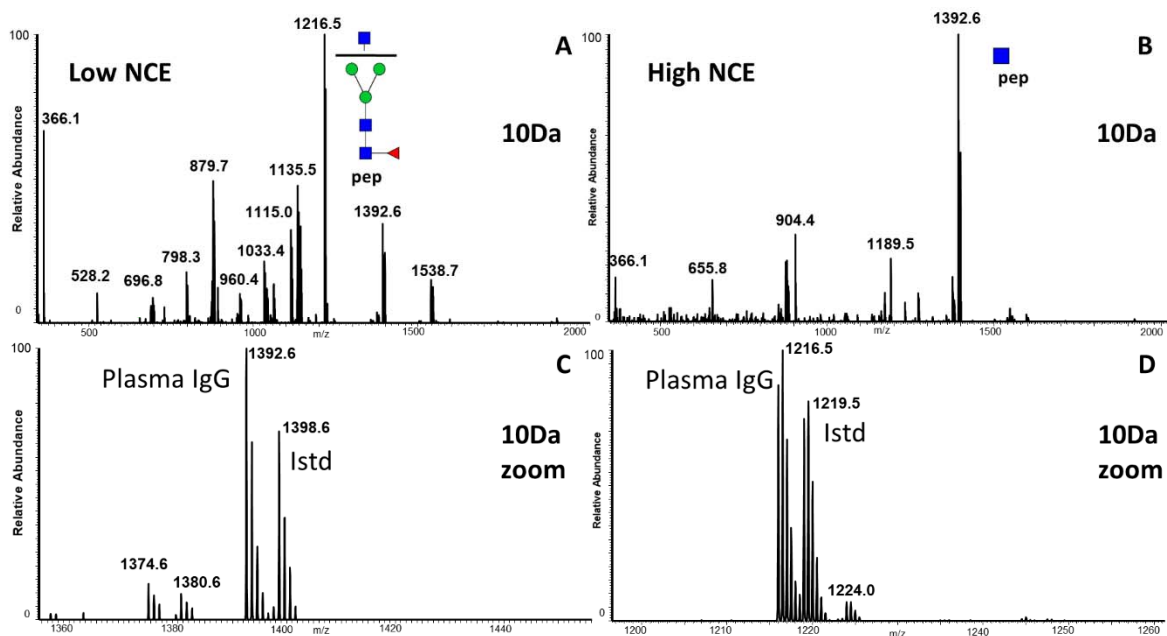

347

348 **Figure 2.** Comparison of the intensities of the most intense soft fragment (low CE) and peptide-  
 349 HexNAc fragment (high CE) obtained under the following conditions: A. Low NCE, 10 Da

350 window with zoom of qualification ions; B. High NCE, 10 Da window with zoom of  
351 quantification ions  
352

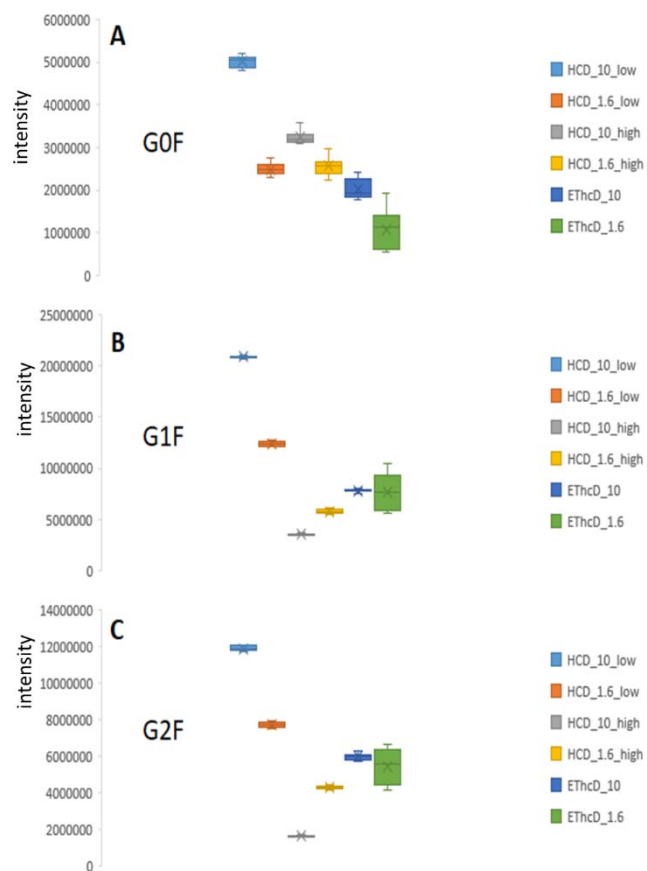

353  
354  
355 **Figure 3.** Comparison of the intensities and RSDs of the quantification of three IgG glycoforms  
356 (G0F, G1F, and G2F) in the samples of unfractionated human serum. We used HCD with low  
357 (11) and high (35) NCE as well as narrow (1.6 Da) and wide (10 Da) window as described in the  
358 legend.

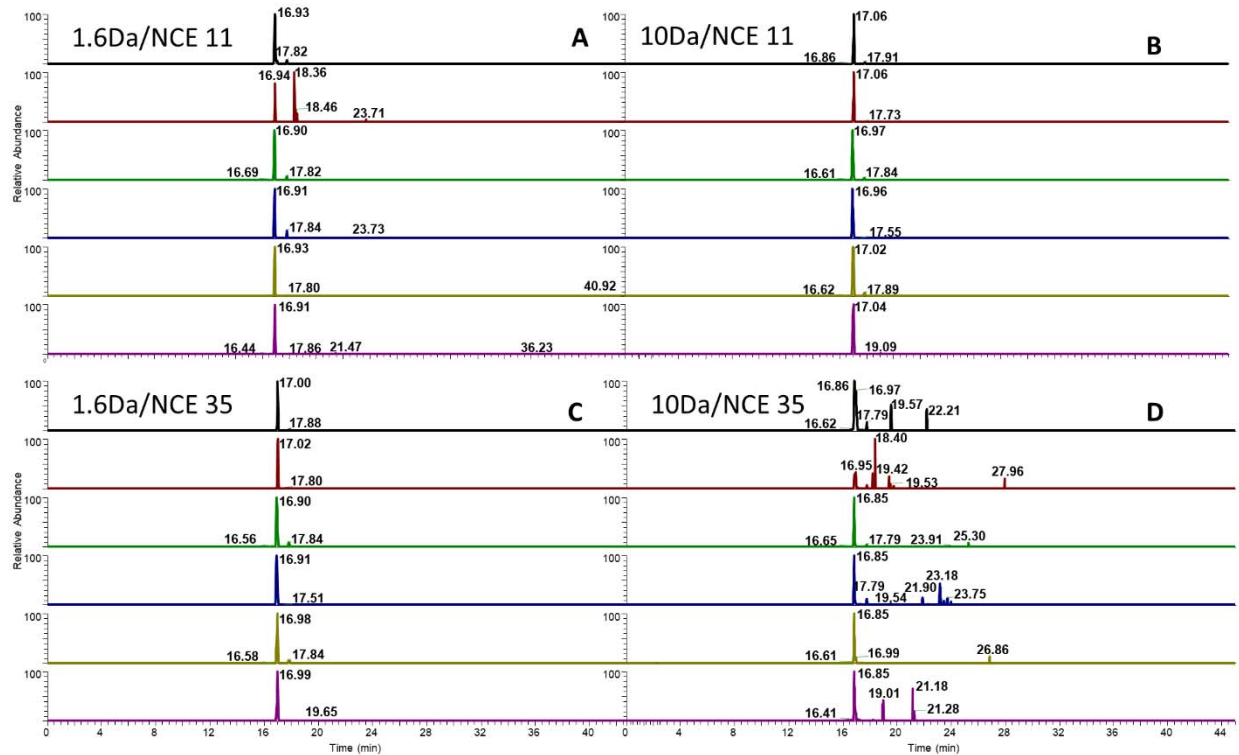

359

360

361 **Figure 4.** Selectivity of the intra-scan A/C (10Da) and inter-scan B/D (1.6Da) normalization  
362 methodology recorded under high XIC signal of peptide-HexNAc Y ion (C/D) and low CE (A/B)  
363 signal of antenna loss Y ion.

364

### 365 **A quantitative EThcD workflow**

366 The design of our synthetic IgG standard and high selectivity of the Y-ions allowed us to test a  
367 new quantitative application of the EThcD fragmentation workflow even when we use a large  
368 isolation window in our PRM workflow. EThcD is primarily used for qualitative analysis like  
369 PTM localization on the glycopeptide. As far as we know, a reliable quantitative ETD-based  
370 workflow has not been reported yet due to the instability of the inter-scan signal. ETD-based  
371 PRM methods could be used to quantify site specific PTMs in case of a mixture of positional

372 isomers. Also, it could be used for quantification of glycopeptides with isobaric peptide  
373 backbones like the IgG2 and IgG3 peptides. Therefore, there is a need to develop a robust ETD-  
374 based methodology for quantitative mass spectrometric analysis. We used a combination of the  
375 wide isolation window with intra-scan normalization to achieve this goal. In this way, we were  
376 able to reduce signal variability of the EThcD fragmentation below 15% (**Table 2**) which is in  
377 line with the FDA guidelines for LOQ determination in biological mass spectrometric  
378 measurements.

379

### 380 **Ultrafast microflow measurement of the IgG glycoforms in a complex matrix**

381

382 We optimized a fast quantitative PRM workflow which uses microflow chromatography utilizing  
383 a multi-nozzle spray. This unique technique enabled analysis of more than 100 samples a day  
384 using a 13-minute analytical method. We optimized our method with direct injection onto a 2 cm  
385 column and performed a desalting step at a higher flow (5  $\mu\text{l}/\text{min}$ ) compared to the 2-minute  
386 gradient separation at 1.5  $\mu\text{l}/\text{min}$ . The equilibration step was performed, again, at a higher flow  
387 rate (5  $\mu\text{l}/\text{min}$ ). A combination of desalting and analytical steps on one column with highly  
388 sensitive multi-nozzle spray tip is the key to our fast chromatography with nanoflow like  
389 sensitivity. Using our PRM methodology, we were able to get an average of 12 points per  
390 chromatographic peak (20s) which exceeds the 8 points per peak recommended for a reliable  
391 quantitative analysis. **Supplemental Figure 7** showed an XIC chromatogram of the IgG1  
392 glycoforms analyzed by the optimized microflow method. We also optimized the amount of  
393 injected sample with the aim to maximize sensitivity of the method. We determined that  
394 maximum sensitivity for quantification of the IgG1 glycoforms could be achieved with an

395 injection of 0.2  $\mu$ g of an unfractionated serum digest on column. This observed optimum  
396 (**Supplemental Figure 8**) results probably from matrix effects related to co-eluted interferences  
397 affecting the ionization process.

398

### 399 **IgG1 glycosylation changes in COVID-19 disease**

400 As a practical example of using our optimized methodology, we analyzed IgG1 glycoforms in  
401 the serum of healthy volunteers (M, n=5) and COVID 19 patients with severe (S, n=6) conditions  
402 (Supplemental Table 1). We quantified 19 previously reported glycoforms of the IgG1 peptide  
403 using the microflow LC-MS/MS PRM workflow. We performed the measurement in triplicates.  
404 Reproducibility of our measurement using normalized intensities was mostly below 10%  
405 (Supplemental Table 2). Despite the precision of our measurement, we did not observe any  
406 significant quantitative differences between the M and S groups, either for the 19 individual  
407 glycoforms determined or the calculated ratios of glycoforms related to fucosylation, bisecting  
408 glycan, sialylation and galactosylation. This observation is in line with previously reported  
409 results<sup>43,44</sup>. The smaller changes in the quantified glycoforms of the total pool of antibodies  
410 compare to covid specific antibodies likely means that enrichment of the CoV2 specific  
411 antibodies is needed to observe the disease-related changes in IgG glycosylation<sup>43</sup>. In summary,  
412 our microflow LC-MS/MS-PRM workflow with the newly available SIS standards achieves  
413 sensitive and accurate quantification of the IgG glycoforms in unfractionated serum using a 13-  
414 minute workflow. The normalization using the SIS standards reduces the coefficients of  
415 variability of the quantification of the glycoforms to less than 5%. We demonstrate that the  
416 combination of the wide isolation window with intra-scan normalization allows EThcD-based  
417 fragmentation with signal variability less than 15%.

418

419 **Acknowledgments**

420

421 This work was supported in part by the National Institutes of Health (NIH grants U01CA230692,  
422 R01CA238455 and S10OD023557 to RG; R43GM128547 to QY; and R01GM080374 to LXW;  
423 and R01AI132389 to AK). The content is solely the responsibility of the authors and does not  
424 necessarily represent the official views of the National Institutes of Health.

425

426

427

428

429 1. Rudd, P. M.; Dwek, R. A., Glycosylation: heterogeneity and the 3D structure of proteins.

430 Crit Rev Biochem Mol Biol 1997, 32 (1), 1-100.

431 2. Cummings, R. D., The repertoire of glycan determinants in the human glycome. Mol

432 Biosyst 2009, 5 (10), 1087-104.

433 3. Fan, Y.; Hu, Y.; Yan, C.; Goldman, R.; Pan, Y.; Mazumder, R.; Dingerdissen, H. M.,

434 Loss and gain of N-linked glycosylation sequons due to single-nucleotide variation in cancer. Sci

435 Rep 2018, 8 (1), 4322.

436 4. Dennis, J. W.; Nabi, I. R.; Demetriou, M., Metabolism, cell surface organization, and

437 disease. Cell 2009, 139 (7), 1229-41.

438 5. Ng, B. G.; Freeze, H. H., Perspectives on Glycosylation and Its Congenital Disorders.

439 Trends Genet 2018, 34 (6), 466-476.

- 440 6. Dempski, R. E., Jr.; Imperiali, B., Oligosaccharyl transferase: gatekeeper to the secretory  
441 pathway. *Curr Opin Chem Biol* 2002, 6 (6), 844-50.
- 442 7. Helenius, A.; Aebi, M., Intracellular functions of N-linked glycans. *Science* 2001, 291  
443 (5512), 2364-2369.
- 444 8. Lehle, L.; Strahl, S.; Tanner, W., Protein glycosylation, conserved from yeast to man: a  
445 model organism helps elucidate congenital human diseases. *Angew Chem Int Ed Engl* 2006, 45  
446 (41), 6802-18.
- 447 9. Takahashi, M.; Kuroki, Y.; Ohtsubo, K.; Taniguchi, N., Core fucose and bisecting  
448 GlcNAc, the direct modifiers of the N-glycan core: their functions and target proteins. *Carbohydr*  
449 *Res* 2009, 344 (12), 1387-90.
- 450 10. Hudak, J. E.; Bertozzi, C. R., Glycotherapy: new advances inspire a reemergence of  
451 glycans in medicine. *Chem Biol* 2014, 21 (1), 16-37.
- 452 11. Rudd, P. M.; Leatherbarrow, R. J.; Rademacher, T. W.; Dwek, R. A., Diversification of  
453 the IgG molecule by oligosaccharides. *Mol Immunol* 1991, 28 (12), 1369-78.
- 454 12. Wang, T. T.; Ravetch, J. V., Functional diversification of IgGs through Fc glycosylation.  
455 *J Clin Invest* 2019, 129 (9), 3492-3498.
- 456 13. Anthony, R. M.; Wermeling, F.; Ravetch, J. V., Novel roles for the IgG Fc glycan. *Ann*  
457 *N Y Acad Sci* 2012, 1253, 170-80.
- 458 14. Arnold, J. N.; Wormald, M. R.; Sim, R. B.; Rudd, P. M.; Dwek, R. A., The impact of  
459 glycosylation on the biological function and structure of human immunoglobulins. *Annu Rev*  
460 *Immunol* 2007, 25, 21-50.
- 461 15. Reusch, D.; Tejada, M. L., Fc glycans of therapeutic antibodies as critical quality  
462 attributes. *Glycobiology* 2015, 25 (12), 1325-34.



- 463 16. Reusch, D.; Habegger, M.; Maier, B.; Maier, M.; Klobeck, R.; Zimmermann, B.;  
464 Hook, M.; Szabo, Z.; Tep, S.; Wegstein, J.; Alt, N.; Bulau, P.; Wuhrer, M., Comparison of  
465 methods for the analysis of therapeutic immunoglobulin G Fc-glycosylation profiles--part 1:  
466 separation-based methods. *MAbs* 2015, 7 (1), 167-79.
- 467 17. Reiding, K. R.; Bondt, A.; Hennig, R.; Gardner, R. A.; O'Flaherty, R.; Trbojevic-  
468 Akmacic, I.; Shubhakar, A.; Hazes, J. M. W.; Reichl, U.; Fernandes, D. L.; Pucic-Bakovic,  
469 M.; Rapp, E.; Spencer, D. I. R.; Dolhain, R.; Rudd, P. M.; Lauc, G.; Wuhrer, M., High-  
470 throughput Serum N-Glycomics: Method Comparison and Application to Study Rheumatoid  
471 Arthritis and Pregnancy-associated Changes. *Mol Cell Proteomics* 2019, 18 (1), 3-15.
- 472 18. O'Flaherty, R.; Muniyappa, M.; Walsh, I.; Stockmann, H.; Hilliard, M.; Hutson, R.;  
473 Saldova, R.; Rudd, P. M., A Robust and Versatile Automated Glycoanalytical Technology for  
474 Serum Antibodies and Acute Phase Proteins: Ovarian Cancer Case Study. *Mol Cell Proteomics*  
475 2019, 18 (11), 2191-2206.
- 476 19. Plomp, R.; Bondt, A.; de Haan, N.; Rombouts, Y.; Wuhrer, M., Recent Advances in  
477 Clinical Glycoproteomics of Immunoglobulins (Igs). *Mol Cell Proteomics* 2016, 15 (7), 2217-28.
- 478 19. Deris, H.; Kifer, D.; Cindric, A.; Petrovic, T.; Cvetko, A.; Trbojevic-Akmacic, I.;  
479 Kolcic, I.; Polasek, O.; Newson, L.; Spector, T.; Menni, C.; Lauc, G., Immunoglobulin G  
480 glycome composition in transition from premenopause to postmenopause. *iScience* 2022, 25 (3),  
481 103897.
- 482 20. Greto, V. L.; Cvetko, A.; Stambuk, T.; Dempster, N. J.; Kifer, D.; Deris, H.; Cindric,  
483 A.; Vuckovic, F.; Falchi, M.; Gillies, R. S.; Tomlinson, J. W.; Gornik, O.; Sgromo, B.;  
484 Spector, T. D.; Menni, C.; Geremia, A.; Arancibia-Carcamo, C. V.; Lauc, G., Extensive weight

- 485 loss reduces glycan age by altering IgG N-glycosylation. *Int J Obes (Lond)* 2021, 45 (7), 1521-  
486 1531.
- 487 21. Haan, N.; Pucic-Bakovic, M.; Novokmet, M.; Falck, D.; Lageveen-Kammeijer, G.;  
488 Razdorov, G.; Vuckovic, F.; Trbojevic-Akmacic, I.; Gornik, O.; Hanic, M.; Wuhrer, M.;  
489 Lauc, G., Developments and Perspectives in High-Throughput Protein Glycomics: Enabling the  
490 Analysis of Thousands of Samples. *Glycobiology* 2022.
- 491 22. Plomp, R.; Bondt, A.; de Haan, N.; Rombouts, Y.; Wuhrer, M., Recent Advances in  
492 Clinical Glycoproteomics of Immunoglobulins (Igs). *Mol Cell Proteomics* 2016, 15 (7), 2217-28.
- 493 23. Sanda, M.; Goldman, R., Data Independent Analysis of IgG Glycoforms in Samples of  
494 Unfractionated Human Plasma. *Anal Chem* 2016, 88 (20), 10118-10125.
- 495 24. Goldman, R.; Sanda, M., Targeted methods for quantitative analysis of protein  
496 glycosylation. *Proteomics Clin Appl* 2015, 9 (1-2), 17-32.
- 497 25. Yuan, W.; Sanda, M.; Wu, J.; Koomen, J.; Goldman, R., Quantitative analysis of  
498 immunoglobulin subclasses and subclass specific glycosylation by LC-MS-MRM in liver  
499 disease. *J Proteomics* 2015, 116, 24-33.
- 500 26. Anderson, L.; Hunter, C. L., Quantitative mass spectrometric multiple reaction  
501 monitoring assays for major plasma proteins. *Mol Cell Proteomics* 2006, 5 (4), 573-88.
- 502 27. Carr, S. A.; Abbatiello, S. E.; Ackermann, B. L.; Borchers, C.; Domon, B.; Deutsch,  
503 E. W.; Grant, R. P.; Hoofnagle, A. N.; Huttenhain, R.; Koomen, J. M.; Liebler, D. C.; Liu,  
504 T.; MacLean, B.; Mani, D. R.; Mansfield, E.; Neubert, H.; Paulovich, A. G.; Reiter, L.;  
505 Vitek, O.; Aebersold, R.; Anderson, L.; Bethem, R.; Blonder, J.; Boja, E.; Botelho, J.;  
506 Boyne, M.; Bradshaw, R. A.; Burlingame, A. L.; Chan, D.; Keshishian, H.; Kuhn, E.;  
507 Kinsinger, C.; Lee, J. S.; Lee, S. W.; Moritz, R.; Oses-Prieto, J.; Rifai, N.; Ritchie, J.;

- 508 Rodriguez, H.; Srinivas, P. R.; Townsend, R. R.; Van Eyk, J.; Whiteley, G.; Wiita, A.;  
509 Weintraub, S., Targeted peptide measurements in biology and medicine: best practices for mass  
510 spectrometry-based assay development using a fit-for-purpose approach. *Mol Cell Proteomics*  
511 2014, 13 (3), 907-17.
- 512 28. Domon, B.; Costello, C. E., A Systematic Nomenclature for Carbohydrate  
513 Fragmentations in Fab-MS MS Spectra of Glycoconjugates. *Glycoconjugate J* 1988, 5 (4), 397-  
514 409.
- 515 29. Huddleston, M. J.; Bean, M. F.; Carr, S. A., Collisional fragmentation of glycopeptides  
516 by electrospray ionization LC/MS and LC/MS/MS: methods for selective detection of  
517 glycopeptides in protein digests. *Anal Chem* 1993, 65 (7), 877-84.
- 518 30. Wührer, M.; Catalina, M. I.; Deelder, A. M.; Hokke, C. H., Glycoproteomics based on  
519 tandem mass spectrometry of glycopeptides. *J Chromatogr B Analyt Technol Biomed Life Sci*  
520 2007, 849 (1-2), 115-28.
- 521 31. Chinoy, Z. S.; Schafer, C. M.; West, C. M.; Boons, G. J., Chemical Synthesis of a  
522 Glycopeptide Derived from Skp1 for Probing Protein Specific Glycosylation. *Chemistry* 2015,  
523 21 (33), 11779-87.
- 524 32. Wang, P.; Zhu, J.; Yuan, Y.; Danishefsky, S. J., Total synthesis of the 2,6-sialylated  
525 immunoglobulin G glycopeptide fragment in homogeneous form. *J Am Chem Soc* 2009, 131  
526 (46), 16669-71.
- 527 33. Huang, W.; Zhang, X. Y.; Ju, T. Z.; Cummings, R. D.; Wang, L. X., Expedient  
528 chemoenzymatic synthesis of CD52 glycopeptide antigens. *Org Biomol Chem* 2010, 8 (22),  
529 5224-5233.

- 530 34. Wang, P.; Aussedat, B.; Vohra, Y.; Danishefsky, S. J., An advance in the chemical  
531 synthesis of homogeneous N-linked glycopolypeptides by convergent aspartylation. *Angew*  
532 *Chem Int Ed Engl* 2012, 51 (46), 11571-5.
- 533 35. Wang, S.; Liu, D.; Qu, J.; Zhu, H.; Chen, C.; Gibbons, C.; Greenway, H.; Wang, P.;  
534 Bollag, R. J.; Liu, K.; Li, L., Streamlined Subclass-Specific Absolute Quantification of Serum  
535 IgG Glycopeptides Using Synthetic Isotope-Labeled Standards. *Anal Chem* 2021, 93 (10), 4449-  
536 4455.
- 537 36. Li, C.; Zhu, S.; Ma, C.; Wang, L. X., Designer alpha1,6-Fucosidase Mutants Enable  
538 Direct Core Fucosylation of Intact N-Glycopeptides and N-Glycoproteins. *J Am Chem Soc* 2017,  
539 139 (42), 15074-15087.
- 540 37. Zong, G.; Li, C.; Wang, L. X., Chemoenzymatic Synthesis of HIV-1 Glycopeptide  
541 Antigens. *Methods Mol Biol* 2020, 2103, 249-262.
- 542 38. Toonstra, C.; Amin, M. N.; Wang, L. X., Site-Selective Chemoenzymatic Glycosylation  
543 of an HIV-1 Polypeptide Antigen with Two Distinct N-Glycans via an Orthogonal Protecting  
544 Group Strategy. *J Org Chem* 2016, 81 (15), 6176-85.
- 545 39. Calderon, A. D.; Liu, Y.; Li, X.; Wang, X.; Chen, X.; Li, L.; Wang, P. G., Substrate  
546 specificity of FUT8 and chemoenzymatic synthesis of core-fucosylated asymmetric N-glycans.  
547 *Org Biomol Chem* 2016, 14 (17), 4027-31.
- 548 40. Eshima, Y.; Higuchi, Y.; Kinoshita, T.; Nakakita, S.; Takegawa, K., Transglycosylation  
549 Activity of Glycosynthase Mutants of Endo-beta-N-Acetylglucosaminidase from *Coprinopsis*  
550 *cinerea*. *PLoS One* 2015, 10 (7), e0132859.

- 551 41. Giddens, J. P.; Lomino, J. V.; Amin, M. N.; Wang, L. X., Endo-F3 Glycosynthase  
552 Mutants Enable Chemoenzymatic Synthesis of Core-fucosylated Triantennary Complex Type  
553 Glycopeptides and Glycoproteins. *J Biol Chem* 2016, 291 (17), 9356-70.
- 554 42. Sjogren, J.; Struwe, W. B.; Cosgrave, E. F.; Rudd, P. M.; Stervander, M.; Allhorn, M.;  
555 Hollands, A.; Nizet, V.; Collin, M., EndoS2 is a unique and conserved enzyme of serotype M49  
556 group A Streptococcus that hydrolyses N-linked glycans on IgG and alpha1-acid glycoprotein.  
557 *Biochem J* 2013, 455 (1), 107-18.
- 558 43. Larsen, M. D.; de Graaf, E. L.; Sonneveld, M. E.; Plomp, H. R.; Nouta, J.; Hoepel,  
559 W.; Chen, H. J.; Linty, F.; Visser, R.; Brinkhaus, M.; Sustic, T.; de Taeye, S. W.; Bentlage,  
560 A. E. H.; Toivonen, S.; Koeleman, C. A. M.; Sainio, S.; Kootstra, N. A.; Brouwer, P. J. M.;  
561 Geyer, C. E.; Derksen, N. I. L.; Wolbink, G.; de Winther, M.; Sanders, R. W.; van Gils, M. J.;  
562 de Bruin, S.; Vlaar, A. P. J.; Amsterdam, U. C.; biobank study, g.; Rispens, T.; den Dunnen,  
563 J.; Zaaijer, H. L.; Wuhrer, M.; Ellen van der Schoot, C.; Vidarsson, G., Afucosylated IgG  
564 characterizes enveloped viral responses and correlates with COVID-19 severity. *Science* 2021,  
565 371 (6532).
- 566 44. Petrovic, T.; Alves, I.; Bugada, D.; Pascual, J.; Vuckovic, F.; Skelin, A.; Gaifem, J.;  
567 Villar-Garcia, J.; Vicente, M. M.; Fernandes, A.; Dias, A. M.; Kurolt, I. C.; Markotic, A.;  
568 Primorac, D.; Soares, A.; Malheiro, L.; Trbojevic-Akmacic, I.; Abreu, M.; Sarmiento, E. C.  
569 R.; Bettinelli, S.; Callegaro, A.; Arosio, M.; Sangiorgio, L.; Lorini, L. F.; Castells, X.;  
570 Horcajada, J. P.; Pinho, S. S.; Allegri, M.; Barrios, C.; Lauc, G., Composition of the  
571 immunoglobulin G glycome associates with the severity of COVID-19. *Glycobiology* 2021, 31  
572 (4), 372-377.
